# Supplementary material
Source: Springer Nature journal article supplement (https://www.springermedizin.de/resource/supplementary/12958_2007_416_MOESM3_ESM.pdf/9567844)

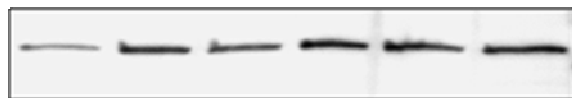

RELM $\alpha$

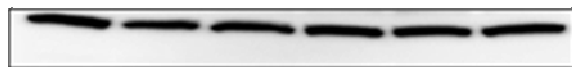

actin

Vehicle

Pioglitazone

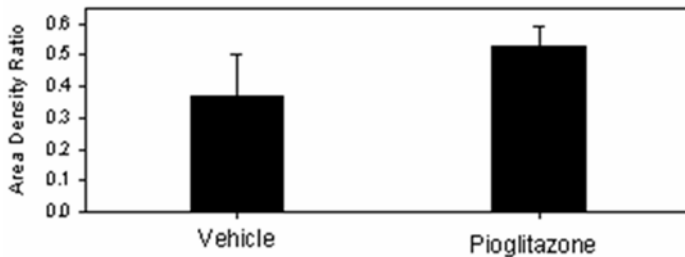

Supplement: MOESM3 [file 9567844]
